# Supplementary material
Source: PubMed Central journal article supplement (PMC6233791)
Supplement: jamasurg-153-e182721-s001.pdf [file jamasurg-153-e182721-s001.pdf]

## Supplementary Online Content

Li Z, Lei Z, Xia Y, et al. Association of preoperative antiviral treatment with incidences of microvascular invasion and early tumor recurrence in hepatitis B virus–related hepatocellular carcinoma. *JAMA Surg*. Published online August 1, 2018. doi:10.1001/jamasurg.2018.2721

**eFigure.** Flowchart of the study

**eTable 1.** Information on AVT medication

**eTable 2.** Logistic regression analysis of MVI presence in non-AVT patients (n = 2036)

**eTable 3.** Incidence of MVI between AVT and non-AVT patients according to tumor size (n = 2362)

**eTable 4.** Clinicopathological characteristics between CRs to AVT and non-AVT patients with a low viral level (n = 1156)

**eTable 5.** Logistic regression analysis of MVI presence in CRs to AVT and non-AVT patients with a low viral level (n = 1156)

**eTable 6.** Cox regression analysis of OS and tumor recurrence in AVT and non-AVT patients (n = 2362)

**eTable 7.** Tumor recurrence and OS between AVT and non-AVT among patients with MVI (n = 1115)

**eTable 8.** Multivariate Cox regression analysis of tumor recurrence and OS between AVT and non-AVT among patients with MVI (n = 1115)

This supplementary material has been provided by the authors to give readers additional information about their work.

**eFigure.** Flowchart of the study

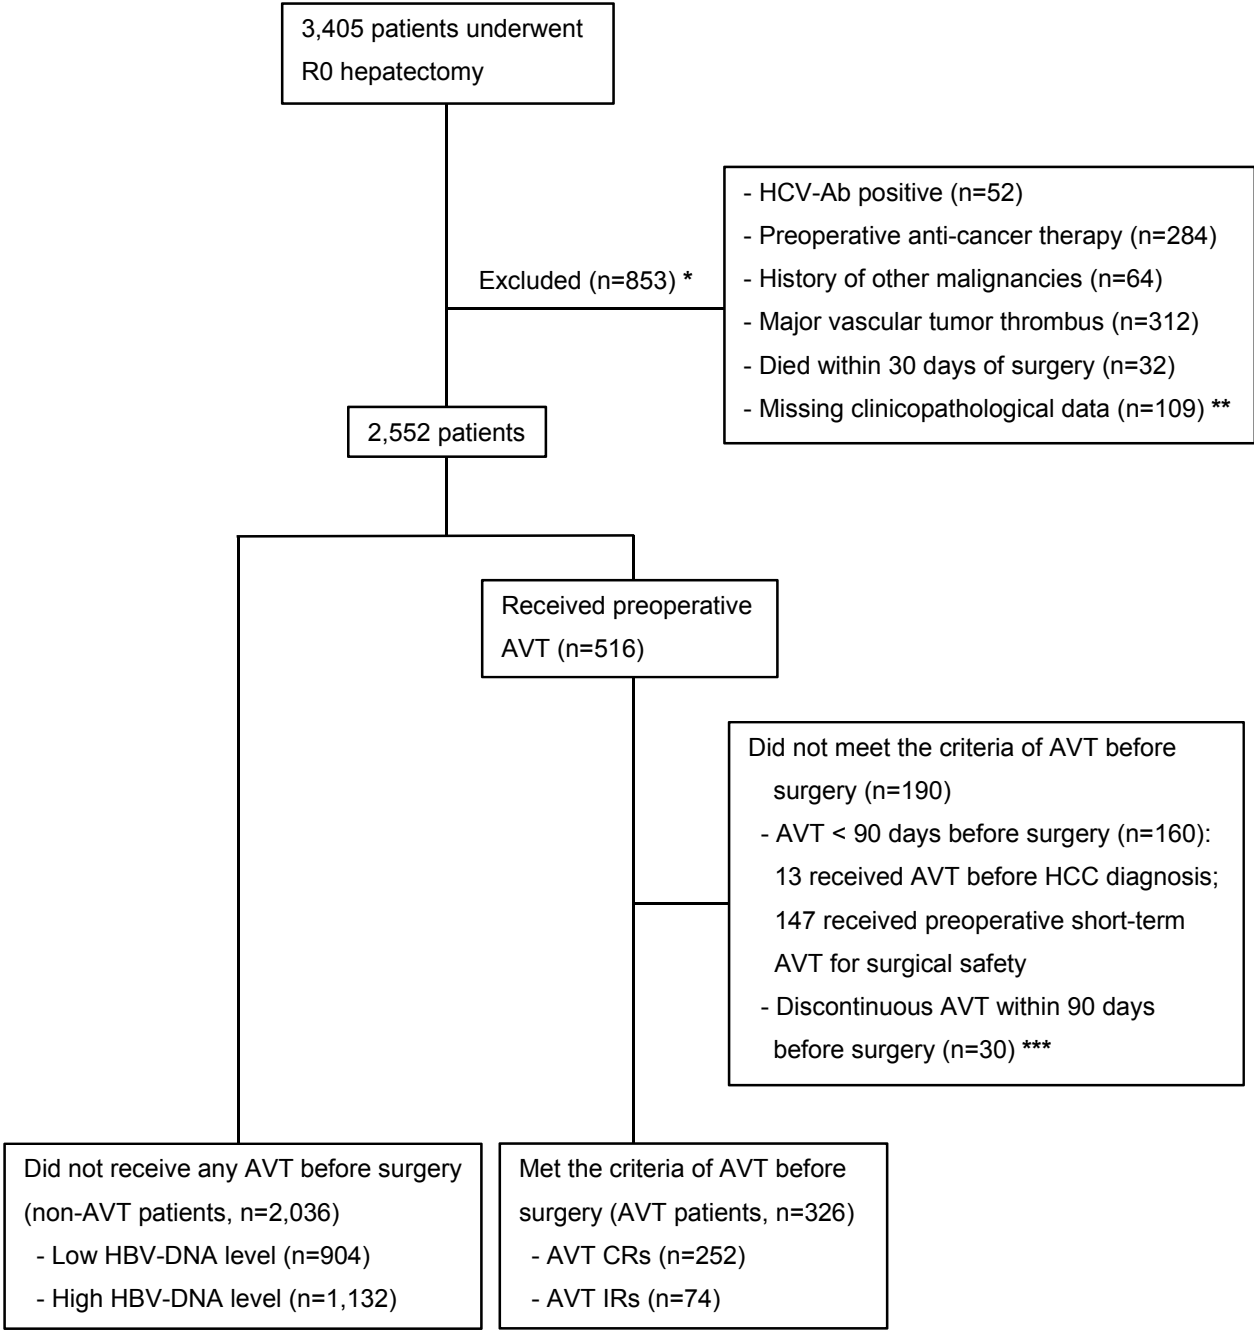

Abbreviations: HCV-Ab, hepatitis C virus antibody; AVT, antiviral treatment; HCC, hepatocellular carcinoma; HBV, hepatitis B virus; CRs, complete responders; IRs, incomplete responders.  
 \*: only the main reason for exclusion is presented.  
 \*\*: included incomplete clinicopathological data (n=59) and lost to follow-up (n=50).  
 \*\*\*: due to side effects (n=11) and miscellaneous reasons (n=19).

**eTable 1.** Information on AVT medication

| <b>Medication</b>                               | <b>AVT patients<br/>(n=326)</b> | <b>Patients failed to meet<br/>preoperative AVT criteria (n=190)</b> |
|-------------------------------------------------|---------------------------------|----------------------------------------------------------------------|
| Lamivudine                                      | 102 (31.3%)                     | 11 (5.8%)                                                            |
| Lamivudine + Adefovir                           | 28 (8.6%)                       | 7 (3.7%)                                                             |
| Lamivudine + Entecavir                          | 18 (5.5%)                       | 9 (4.7%)                                                             |
| Adefovir                                        | 84 (25.8%)                      | 72 (37.9%)                                                           |
| Entecavir                                       | 47 (14.4%)                      | 56 (29.5%)                                                           |
| Telbivudine                                     | 20 (6.1%)                       | 21 (11.1%)                                                           |
| Interferon alpha (conventional or<br>pegylated) | 11 (3.4%)                       | 4 (2.1%)                                                             |
| Interferon alpha + nucleos(t)ide analogues      | 6 (1.8%)                        | 2 (1.1%)                                                             |
| Other combinations                              | 10 (3.1%)                       | 8 (4.2%)                                                             |

Abbreviation: AVT, antiviral treatment.

Drugs and dosage: lamivudine (GlaxoSmithKline) 100 mg per day; adefovir (GlaxoSmithKline) 10 mg per day; entecavir (Sino-American Squibb) 0.5 mg per day; telbivudine (Novartis) 600 mg per day; interferon alpha: conventional (3SBio Inc or Hualida Biotech) 5 MIU thrice weekly; pegylated (Roche) 180 µg once weekly.

**eTable 2.** Logistic regression analysis of MVI presence in non-AVT patients (n = 2036)

| Variable                                     | Univariate |             |         | Multivariate |             |         |
|----------------------------------------------|------------|-------------|---------|--------------|-------------|---------|
|                                              | OR         | 95% CI      | P value | OR           | 95% CI      | P value |
| Age, years (continuous)                      | 0.985      | 0.977-0.994 | .001    |              |             |         |
| Sex, male vs. female                         | 1.160      | 0.913-1.475 | .23     |              |             |         |
| Diabetes mellitus, yes vs. no                | 0.909      | 0.677-1.221 | .53     |              |             |         |
| HBeAg, positive vs. negative                 | 1.012      | 0.841-1.219 | .90     |              |             |         |
| HBeAb, positive vs. negative                 | 0.850      | 0.699-1.033 | .10     |              |             |         |
| HBV-DNA level, IU/mL, ≥ vs. <2,000           | 1.345      | 1.128-1.603 | .001    | 1.399        | 1.151-1.701 | .001    |
| ALT, U/L, > vs. ≤44                          | 0.857      | 0.718-1.024 | .09     |              |             |         |
| AST, U/L, > vs. ≤40                          | 1.324      | 1.111-1.579 | .002    |              |             |         |
| GGT, U/L, > vs. ≤64                          | 1.198      | 1.007-1.426 | .04     |              |             |         |
| TBIL, μmol/L, > vs. ≤17                      | 0.953      | 0.780-1.164 | .64     |              |             |         |
| ALB, g/L, < vs. ≥35                          | 0.732      | 0.471-1.137 | .17     |              |             |         |
| PT, seconds, > vs. ≤13                       | 0.995      | 0.786-1.261 | .97     |              |             |         |
| PLT, 10 <sup>9</sup> /L, < vs. ≥100          | 0.851      | 0.681-1.063 | .16     |              |             |         |
| GLU, mmol/L, > vs. ≤7                        | 0.789      | 0.551-1.130 | .20     |              |             |         |
| Creatinine, μmol/L, > vs. ≤104               | 0.561      | 0.237-1.329 | .19     |              |             |         |
| WBC, 10 <sup>9</sup> /L, < vs. ≥4            | 0.899      | 0.725-1.113 | .33     |              |             |         |
| Hemoglobin, g/L (continuous)                 | 1.000      | 0.995-1.006 | .87     |              |             |         |
| AFP, μg/L, > vs. ≤400                        | 2.392      | 1.987-2.879 | <.001   | 1.622        | 1.319-1.995 | <.001   |
| Blood loss, mL, > vs. ≤800                   | 1.416      | 0.963-2.083 | .08     |              |             |         |
| Transfusion, yes vs. no                      | 1.406      | 1.072-1.845 | .01     |              |             |         |
| Surgical margin, cm, < vs. ≥1                | 1.087      | 0.883-1.339 | .43     |              |             |         |
| Tumor diameter, cm (continuous)              | 1.083      | 1.057-1.109 | <.001   | 1.040        | 1.011-1.069 | .007    |
| Tumor number, multiple vs. solitary          | 1.298      | 0.985-1.709 | .06     |              |             |         |
| Tumor encapsulation, incomplete vs. complete | 1.650      | 1.472-1.850 | <.001   | 2.441        | 2.006-2.970 | <.001   |
| Satellite nodules, presence vs. absence      | 2.773      | 2.150-3.576 | <.001   | 1.949        | 1.473-2.579 | <.001   |
| Edmondson-Steiner grade, III/IV vs. I/II     | 4.252      | 3.463-5.221 | <.001   | 3.107        | 2.476-3.897 | <.001   |
| Cirrhosis, yes vs. no                        | 1.347      | 1.131-1.603 | .001    | 1.852        | 1.507-2.275 | <.001   |

Abbreviations: MVI, microvascular invasion; AVT, antiviral treatment; OR, odds ratio; CI, confidence interval; HBeAg, hepatitis B e antigen; HBeAb, hepatitis B e antibody; HBV-DNA, hepatitis B virus deoxyribonucleic acid; ALT, alanine aminotransferase; AST, aspartate aminotransferase; GGT, gamma glutamyltransferase; TBIL, total bilirubin; ALB, albumin; PT, prothrombin time; PLT, platelet count; GLU, glucose; WBC, white blood cell; AFP, alpha fetoprotein.

**eTable 3.** Incidence of MVI between AVT and non-AVT patients according to tumor size (n = 2362)

| <b>Tumor size</b> | <b>Non-AVT (%)</b> | <b>AVT (%)</b> | <b>P value</b> |
|-------------------|--------------------|----------------|----------------|
| <b>≤3 cm*</b>     | 229/537 (42.6)     | 46/131 (35.1)  | .12            |
| <b>≤5 cm</b>      | 492/1133 (43.4)    | 77/225 (34.2)  | .01            |
| <b>≤10 cm</b>     | 820/1775 (46.2)    | 116/309 (37.5) | .005           |
| <b>&gt;10 cm</b>  | 169/261 (64.8)     | 10/17 (58.8)   | .62            |

Abbreviations: MVI, microvascular invasion; AVT, antiviral treatment.

\*: among all the patients who had tumor <3 cm (n=668), the incidence of MVI between the patients who received preoperative AVT ≥1 year (n=98) versus the patients who did not receive any preoperative AVT or received preoperative AVT <1 year (n=570) was 31.6% vs. 42.8% (P=.04).

**eTable 4.** Clinicopathological characteristics between CRs to AVT and non-AVT patients with a low viral level (n = 1156)

| Variable                               | Number (%)/median (IQR)                |                     |         |
|----------------------------------------|----------------------------------------|---------------------|---------|
|                                        | Non-AVT with a low viral level (n=904) | AVT CRs (n=252)     | P value |
| Age, years                             | 50.0 (43.0–57.5)                       | 50.0 (41.6-57.3)    | .81     |
| Sex, male                              | 755 (83.5)                             | 214 (84.9)          | .59     |
| Diabetes mellitus, yes                 | 103 (11.4)                             | 34 (13.5)           | .36     |
| HBeAg, positive                        | 180 (19.9)                             | 37 (14.7)           | .06     |
| HBeAb, positive                        | 740 (81.9)                             | 195 (77.4)          | .11     |
| HBV-DNA level, detectable (≥200 IU/mL) | 70 (7.7)                               | 21 (8.3)            | .76     |
| ALT, U/L, >44                          | 286 (31.6)                             | 73 (29.0)           | .42     |
| AST, U/L, >40                          | 319 (35.3)                             | 69 (27.4)           | .02     |
| GGT, U/L, >64                          | 424 (46.9)                             | 103 (40.9)          | .09     |
| TBIL, μmol/L, >17                      | 228 (25.2)                             | 66 (26.2)           | .76     |
| ALB, g/L, <35                          | 26 (2.9)                               | 6 (2.4)             | .67     |
| PT, seconds, >13                       | 114 (12.6)                             | 58 (23.0)           | <.001   |
| PLT, ×10 <sup>9</sup> /L, <100         | 149 (16.5)                             | 74 (29.4)           | <.001   |
| GLU, mmol/L, >7                        | 70 (7.7)                               | 17 (6.7)            | .60     |
| Creatinine, μmol/L, >104               | 16 (1.8)                               | 4 (1.6)             | .84     |
| WBC, ×10 <sup>9</sup> /L, <4           | 168 (18.6)                             | 66 (26.2)           | .008    |
| Hemoglobin, g/L                        | 143.0 (133.0-153.0)                    | 144.0 (131.3-154.0) | .77     |
| AFP, μg/L, >400                        | 323 (35.7)                             | 67 (26.6)           | .007    |
| Blood loss, mL, >800                   | 56 (6.2)                               | 7 (2.8)             | .04     |
| Transfusion, yes                       | 108 (11.9)                             | 18 (7.1)            | .03     |
| Adjuvant TACE, yes                     | 292 (32.3)                             | 86 (34.1)           | .59     |
| Postoperative AVT, yes                 | 148 (16.4)                             | 193 (76.6)          | <.001   |
| Surgical margin, cm, <1                | 675 (74.7)                             | 189 (75.0)          | .92     |
| Tumor diameter, cm                     | 4.6 (3.0-7.6)                          | 3.7 (2.4-5.3)       | <.001   |
| Tumor number, multiple                 | 92 (10.2)                              | 25 (9.9)            | .91     |
| Tumor encapsulation, incomplete        | 490 (54.2)                             | 110 (43.7)          | .003    |
| Microvascular invasion, presence       | 402 (44.5)                             | 88 (34.9)           | .007    |
| Satellite nodules, presence            | 134 (14.8)                             | 40 (15.9)           | .68     |
| Edmondson-Steiner grade, III/IV        | 616 (68.1)                             | 155 (61.5)          | .048    |
| Cirrhosis, yes                         | 415 (45.9)                             | 164 (65.1)          | <.001   |

Abbreviations: CRs, complete responders; AVT, antiviral treatment; IQR, interquartile range; HBeAg, hepatitis B e antigen; HBeAb, hepatitis B e antibody; HBV-DNA, hepatitis B virus deoxyribonucleic acid; ALT, alanine aminotransferase; AST, aspartate aminotransferase; GGT, gamma glutamyltransferase; TBIL, total bilirubin; ALB, albumin; PT, prothrombin time; PLT, platelet count; GLU, glucose; WBC, white blood cell; AFP, alpha fetoprotein; TACE, transarterial chemoembolization.

**eTable 5.** Logistic regression analysis of MVI presence in CRs to AVT and non-AVT patients with a low viral level (n = 1156)

| Variable                                     | Univariate |             |         | Multivariate |             |         |
|----------------------------------------------|------------|-------------|---------|--------------|-------------|---------|
|                                              | OR         | 95% CI      | P value | OR           | 95% CI      | P value |
| Age, years (continuous)                      | 0.993      | 0.982-1.004 | .20     |              |             |         |
| Sex, male vs. female                         | 1.061      | 0.772-1.458 | .71     |              |             |         |
| Diabetes mellitus, yes vs. no                | 0.998      | 0.695-1.431 | .99     |              |             |         |
| HBeAg, positive vs. negative                 | 0.911      | 0.675-1.230 | .54     |              |             |         |
| HBeAb, positive vs. negative                 | 0.886      | 0.659-1.190 | .42     |              |             |         |
| HBV-DNA level, detectable vs. undetectable   | 0.926      | 0.599-1.431 | .73     |              |             |         |
| AVT, yes vs. no                              | 0.670      | 0.501-0.896 | .007    | 0.690        | 0.500-0.952 | .02     |
| ALT, U/L, > vs. ≤44                          | 0.776      | 0.602-1.001 | .051    |              |             |         |
| AST, U/L, > vs. ≤40                          | 1.299      | 1.015-1.661 | .04     |              |             |         |
| GGT, U/L, > vs. ≤64                          | 1.147      | 0.908-1.450 | .25     |              |             |         |
| TBIL, μmol/L, > vs. ≤17                      | 1.026      | 0.785-1.341 | .85     |              |             |         |
| ALB, g/L, < vs. ≥35                          | 0.705      | 0.337-1.477 | .36     |              |             |         |
| PT, seconds, > vs. ≤13                       | 0.846      | 0.608-1.179 | .32     |              |             |         |
| PLT, 10 <sup>9</sup> /L, < vs. ≥100          | 0.861      | 0.639-1.160 | .33     |              |             |         |
| GLU, mmol/L, > vs. ≤7                        | 0.862      | 0.551-1.349 | .52     |              |             |         |
| Creatinine, μmol/L, > vs. ≤104               | 0.728      | 0.288-1.838 | .50     |              |             |         |
| WBC, 10 <sup>9</sup> /L, < vs. ≥4            | 0.834      | 0.622-1.118 | .23     |              |             |         |
| Hemoglobin, g/L (continuous)                 | 1.001      | 0.994-1.008 | .86     |              |             |         |
| AFP, μg/L, > vs. ≤400                        | 2.939      | 2.285-3.781 | <.001   | 2.173        | 1.652-2.857 | <.001   |
| Blood loss, mL, > vs. ≤800                   | 1.877      | 1.123-3.135 | .02     |              |             |         |
| Transfusion, yes vs. no                      | 1.630      | 1.124-2.362 | .01     |              |             |         |
| Surgical margin, cm, < vs. ≥1                | 0.924      | 0.707-1.208 | .56     |              |             |         |
| Tumor diameter, cm (continuous)              | 1.080      | 1.046-1.115 | <.001   |              |             |         |
| Tumor number, multiple vs. solitary          | 0.834      | 0.564-1.235 | .37     |              |             |         |
| Tumor encapsulation, incomplete vs. complete | 2.675      | 2.100-3.407 | <.001   | 1.991        | 1.531-2.590 | <.001   |
| Satellite nodules, presence vs. absence      | 2.498      | 1.794-3.478 | <.001   | 1.850        | 1.293-2.648 | .001    |
| Edmondson-Steiner grade, III/IV vs. I/II     | 3.905      | 2.954-5.164 | <.001   | 2.815        | 2.079-3.812 | <.001   |
| Cirrhosis, yes vs. no                        | 1.398      | 1.106-1.767 | .005    | 1.902        | 1.460-2.478 | <.001   |

Abbreviations: MVI, microvascular invasion; CRs, complete responders; AVT, antiviral treatment; OR, odds ratio; CI, confidence interval; HBeAg, hepatitis B e antigen; HBeAb, hepatitis B e antibody; HBV-DNA, hepatitis B virus deoxyribonucleic acid; ALT, alanine aminotransferase; AST, aspartate aminotransferase; GGT, gamma glutamyltransferase; TBIL, total bilirubin; ALB, albumin; PT, prothrombin time; PLT, platelet count; GLU, glucose; WBC, white blood cell; AFP, alpha fetoprotein.

**eTable 6.** Cox regression analysis of OS and tumor recurrence in AVT and non-AVT patients (n = 2362)

| Variable                            | OS         |             |         |              |             |         | Tumor recurrence |             |         |              |             |         |
|-------------------------------------|------------|-------------|---------|--------------|-------------|---------|------------------|-------------|---------|--------------|-------------|---------|
|                                     | Univariate |             |         | Multivariate |             |         | Univariate       |             |         | Multivariate |             |         |
|                                     | HR         | 95% CI      | P value | HR           | 95% CI      | P value | HR               | 95% CI      | P value | HR           | 95% CI      | P value |
| Age, years (continuous)             | 1.002      | 0.995-1.009 | .53     |              |             |         | 0.998            | 0.993-1.003 | .41     |              |             |         |
| Sex, male vs. female                | 1.208      | 0.991-1.472 | .06     |              |             |         | 1.171            | 1.016-1.349 | .03     |              |             |         |
| Diabetes mellitus, yes vs. no       | 1.194      | 0.969-1.471 | .10     |              |             |         | 0.913            | 0.771-1.081 | .29     |              |             |         |
| HBeAg, positive vs. negative        | 1.266      | 1.097-1.460 | .001    | 1.262        | 1.092-1.460 | .002    | 1.301            | 1.169-1.448 | <.001   | 1.309        | 1.174-1.459 | <.001   |
| HBeAb, positive vs. negative        | 0.853      | 0.735-0.989 | .04     |              |             |         | 0.822            | 0.736-0.919 | .001    |              |             |         |
| HBV-DNA level, IU/mL, ≥ vs. <2,000  | 1.261      | 1.100-1.446 | .001    |              |             |         | 1.243            | 1.123-1.376 | <.001   |              |             |         |
| AVT, yes vs. no                     | 0.641      | 0.510-0.805 | <.001   | 0.752        | 0.598-0.947 | .02     | 0.677            | 0.577-0.796 | <.001   | 0.764        | 0.649-0.899 | .001    |
| ALT, U/L, > vs. ≤44                 | 1.294      | 1.128-1.483 | <.001   |              |             |         | 1.287            | 1.161-1.426 | <.001   |              |             |         |
| AST, U/L, > vs. ≤40                 | 1.809      | 1.578-2.073 | <.001   | 1.237        | 1.057-1.449 | .008    | 1.561            | 1.410-1.729 | <.001   | 1.129        | 1.004-1.268 | .04     |
| GGT, U/L, > vs. ≤64                 | 1.689      | 1.471-1.939 | <.001   | 1.174        | 1.003-1.373 | .045    | 1.557            | 1.406-1.724 | <.001   | 1.193        | 1.064-1.338 | .002    |
| TBIL, μmol/L, > vs. ≤17             | 1.131      | 0.970-1.320 | .12     |              |             |         | 1.049            | 0.934-1.178 | .42     |              |             |         |
| ALB, g/L, < vs. ≥35                 | 1.515      | 1.126-2.040 | .006    | 1.366        | 1.009-1.849 | .04     | 1.337            | 1.051-1.699 | .02     |              |             |         |
| PT, seconds, > vs. ≤13              | 1.169      | 0.983-1.390 | .08     |              |             |         | 1.078            | 0.945-1.230 | .26     |              |             |         |
| PLT, 10 <sup>9</sup> /L, < vs. ≥100 | 1.060      | 0.898-1.252 | .49     |              |             |         | 1.041            | 0.920-1.178 | .52     |              |             |         |
| GLU, mmol/L, > vs. ≤7               | 1.270      | 0.986-1.636 | .06     |              |             |         | 1.018            | 0.830-1.248 | .86     |              |             |         |
| Creatinine, μmol/L, > vs. ≤104      | 1.134      | 0.608-2.115 | .69     |              |             |         | 0.750            | 0.443-1.269 | .28     |              |             |         |
| WBC, 10 <sup>9</sup> /L, < vs. ≥4   | 0.882      | 0.744-1.046 | .15     |              |             |         | 0.961            | 0.850-1.087 | .53     |              |             |         |
| Hemoglobin, g/L (continuous)        | 0.995      | 0.991-0.999 | .02     |              |             |         | 0.999            | 0.996-1.002 | .53     |              |             |         |
| AFP, μg/L, > vs. ≤400               | 1.657      | 1.444-1.901 | <.001   | 1.247        | 1.080-1.440 | .003    | 1.428            | 1.286-1.585 | <.001   | 1.159        | 1.039-1.292 | .008    |
| Blood loss, mL, > vs. ≤800          | 2.328      | 1.824-2.970 | <.001   |              |             |         | 1.819            | 1.479-2.238 | <.001   |              |             |         |
| Transfusion, yes vs. no             | 2.117      | 1.764-2.542 | <.001   | 1.351        | 1.105-1.652 | .003    | 1.693            | 1.458-1.966 | <.001   | 1.199        | 1.020-1.411 | .03     |
| Adjuvant TACE, yes vs. no           | 1.095      | 0.951-1.261 | .21     |              |             |         | 1.111            | 0.999-1.234 | .052    |              |             |         |



|                                                     |       |             |       |       |             |       |       |             |       |       |             |       |
|-----------------------------------------------------|-------|-------------|-------|-------|-------------|-------|-------|-------------|-------|-------|-------------|-------|
| <b>Postoperative AVT, yes vs. no</b>                | 0.856 | 0.737-0.995 | .04   |       |             |       | 0.897 | 0.803-1.001 | .053  |       |             |       |
| <b>Surgical margin, cm, &lt; vs. ≥1</b>             | 1.732 | 1.438-2.085 | <.001 | 1.259 | 1.036-1.531 | .02   | 1.594 | 1.399-1.816 | <.001 | 1.270 | 1.107-1.458 | .001  |
| <b>Tumor diameter, cm (continuous)</b>              | 1.109 | 1.092-1.126 | <.001 | 1.051 | 1.030-1.071 | <.001 | 1.087 | 1.074-1.100 | <.001 | 1.041 | 1.025-1.057 | <.001 |
| <b>Tumor number, multiple vs. solitary</b>          | 1.603 | 1.326-1.938 | <.001 | 1.440 | 1.186-1.748 | <.001 | 1.446 | 1.247-1.677 | <.001 | 1.291 | 1.110-1.502 | .001  |
| <b>Microvascular invasion, presence vs. absence</b> | 1.907 | 1.661-2.189 | <.001 | 1.518 | 1.310-1.758 | <.001 | 1.655 | 1.495-1.833 | <.001 | 1.392 | 1.248-1.552 | <.001 |
| <b>Tumor encapsulation, incomplete vs. complete</b> | 1.374 | 1.198-1.576 | <.001 |       |             |       | 1.277 | 1.153-1.413 | <.001 |       |             |       |
| <b>Satellite nodules, presence vs. absence</b>      | 1.910 | 1.618-2.254 | <.001 | 1.321 | 1.111-1.571 | .002  | 1.859 | 1.636-2.112 | <.001 | 1.413 | 1.236-1.616 | <.001 |
| <b>Edmondson-Steiner grade, III/IV vs. I/II</b>     | 2.062 | 1.750-2.429 | <.001 | 1.385 | 1.159-1.655 | <.001 | 1.650 | 1.472-1.849 | <.001 | 1.206 | 1.065-1.366 | .003  |
| <b>Cirrhosis, yes vs. no</b>                        | 0.849 | 0.741-0.973 | .02   |       |             |       | 0.946 | 0.855-1.047 | .28   |       |             |       |

Abbreviations: OS, overall survival; HR, hazard ratio; CI, confidence interval; HBeAg, hepatitis B e antigen; HBeAb, hepatitis B e antibody; HBV-DNA, hepatitis B virus deoxyribonucleic acid; AVT, antiviral treatment; ALT, alanine aminotransferase; AST, aspartate aminotransferase; GGT, gamma glutamyltransferase; TBIL, total bilirubin; ALB, albumin; PT, prothrombin time; PLT, platelet count; GLU, glucose; WBC, white blood cell; AFP, alpha fetoprotein; TACE, transarterial chemoembolization.

**eTable 7.** Tumor recurrence and OS between AVT and non-AVT among patients with MVI (n = 1115)

| Groups |                 | Early tumor recurrence |            |            |         | Overall tumor recurrence |            |            |         | OS         |            |            |         |
|--------|-----------------|------------------------|------------|------------|---------|--------------------------|------------|------------|---------|------------|------------|------------|---------|
|        |                 | 6-month (%)            | 1-year (%) | 2-year (%) | P value | 1-year (%)               | 3-year (%) | 5-year (%) | P value | 1-year (%) | 3-year (%) | 5-year (%) | P value |
| All    | Non-AVT (n=989) | 30.7                   | 46.6       | 62.4       | .003    | 46.6                     | 70.5       | 77.2       | .009    | 82.0       | 59.6       | 47.0       | .02     |
|        | AVT (n=126)     | 20.7                   | 33.9       | 49.3       |         | 34.1                     | 59.8       | 70.0       |         | 91.1       | 68.3       | 59.2       |         |
| ≤3 cm  | Non-AVT (n=229) | 16.2                   | 30.4       | 46.1       | .23     | 30.3                     | 56.6       | 66.0       | .21     | 91.6       | 77.7       | 65.9       | .73     |
|        | AVT (n=46)      | 13.0                   | 24.2       | 36.3       |         | 24.4                     | 44.9       | 56.8       |         | 93.3       | 79.4       | 70.8       |         |
| ≤5 cm  | Non-AVT (n=492) | 21.2                   | 37.1       | 53.6       | .045    | 37.1                     | 61.8       | 69.6       | .053    | 88.7       | 70.8       | 58.2       | .34     |
|        | AVT (n=77)      | 14.3                   | 27.7       | 41.2       |         | 28.0                     | 50.5       | 59.8       |         | 92.0       | 73.8       | 65.9       |         |
| ≤10 cm | Non-AVT (n=820) | 26.3                   | 43.0       | 59.4       | .02     | 43.0                     | 67.7       | 75.3       | .04     | 84.7       | 63.4       | 51.1       | .10     |
|        | AVT (n=116)     | 19.0                   | 33.1       | 47.7       |         | 33.5                     | 59.1       | 68.6       |         | 93.0       | 69.2       | 59.4       |         |
| >10 cm | Non-AVT (n=169) | 52.1                   | 63.9       | 76.9       | .46     | 63.9                     | 84.5       | 86.4       | .48     | 69.1       | 41.2       | 26.8       | .29     |
|        | AVT (n=10)      | 42.1                   | 42.1       | 70.0       |         | 42.1                     | 67.8       | 89.3       |         | 70.0       | 58.3       | 58.3       |         |

Abbreviations: OS, overall survival; AVT, antiviral treatment; MVI, microvascular invasion.

**eTable 8.** Multivariate Cox regression analysis of tumor recurrence and OS between AVT and non-AVT among patients with MVI (n = 1115)

| Variable                                         | Early tumor recurrence |             |         | Overall tumor recurrence |             |         | OS    |             |         |
|--------------------------------------------------|------------------------|-------------|---------|--------------------------|-------------|---------|-------|-------------|---------|
|                                                  | HR                     | 95% CI      | P value | HR                       | 95% CI      | P value | HR    | 95% CI      | P value |
| <b>HBeAg</b> , positive vs. negative             | 1.337                  | 1.137-1.572 | <.001   | 1.390                    | 1.199-1.612 | <.001   | 1.408 | 1.164-1.703 | <.001   |
| <b>AVT</b> , yes vs. no                          | 0.717                  | 0.548-0.938 | .02     | 0.787                    | 0.622-0.996 | .046    |       |             |         |
| <b>AST</b> , U/L, > vs. ≤40                      |                        |             |         | 1.174                    | 1.008-1.367 | .04     |       |             |         |
| <b>GGT</b> , U/L, > vs. ≤64                      |                        |             |         |                          |             |         | 1.262 | 1.033-1.542 | .02     |
| <b>ALB</b> , g/L, < vs. ≥35                      |                        |             |         | 1.441                    | 1.015-2.046 | .04     |       |             |         |
| <b>AFP</b> , µg/L, > vs. ≤400                    | 1.422                  | 1.217-1.662 | <.001   | 1.327                    | 1.151-1.530 | <.001   | 1.376 | 1.143-1.656 | .001    |
| <b>Transfusion</b> , yes vs. no                  |                        |             |         |                          |             |         | 1.296 | 1.002-1.675 | .048    |
| <b>Surgical margin</b> , cm, < vs. ≥1            | 1.508                  | 1.211-1.877 | <.001   | 1.390                    | 1.147-1.683 | .001    | 1.448 | 1.104-1.900 | .008    |
| <b>Tumor diameter</b> , cm (continuous)          | 1.050                  | 1.030-1.070 | <.001   | 1.039                    | 1.020-1.059 | <.001   | 1.051 | 1.026-1.076 | <.001   |
| <b>Tumor number</b> , multiple vs. solitary      |                        |             |         |                          |             |         | 1.498 | 1.170-1.920 | .001    |
| <b>Satellite nodules</b> , presence vs. absence  | 1.414                  | 1.187-1.684 | <.001   | 1.487                    | 1.263-1.750 | <.001   | 1.245 | 1.009-1.537 | .04     |
| <b>Edmondson-Steiner grade</b> , III/IV vs. I/II | 1.335                  | 1.055-1.688 | .02     | 1.240                    | 1.011-1.520 | .04     | 1.687 | 1.243-2.290 | .001    |

Abbreviations: OS, overall survival; AVT, antiviral treatment; MVI, microvascular invasion; HR, hazard ratio; CI, confidence interval; HBeAg, hepatitis B e antigen; AST, aspartate aminotransferase; GGT, gamma glutamyltransferase; ALB, albumin; AFP, alpha fetoprotein.
